# Supplementary material for: Prevalence of disposable pod use and consumer preference for e-cigarette product characteristics among vape shop customers in Southern California: a cross-sectional study
Source: PubMed Central journal article supplement — BMJ Open. 2021 Oct 5;11(10):e049604. doi: 10.1136/bmjopen-2021-049604 (PMC8493914; doi:10.1136/bmjopen-2021-049604), 2021-10-05
Supplement: bmjopen-2021-049604.draft_revisions.pdf [file bmjopen-2021-049604.draft_revisions.pdf]

# BMJ Open

BMJ Open is committed to open peer review. As part of this commitment we make the peer review history of every article we publish publicly available.

When an article is published we post the peer reviewers' comments and the authors' responses online. We also post the versions of the paper that were used during peer review. These are the versions that the peer review comments apply to.

The versions of the paper that follow are the versions that were submitted during the peer review process. They are not the versions of record or the final published versions. They should not be cited or distributed as the published version of this manuscript.

BMJ Open is an open access journal and the full, final, typeset and author-corrected version of record of the manuscript is available on our site with no access controls, subscription charges or pay-per-view fees (<http://bmjopen.bmj.com>).

If you have any questions on BMJ Open's open peer review process please email [info.bmjopen@bmj.com](mailto:info.bmjopen@bmj.com)

# BMJ Open

## Disposable pod use among vape shop customers: Does the flavor preference matter?

|                               |                                                                                                                                                                                                                                                                                                                                                                                                                                                                                                                                                                                                                                                                                                                                                                               |
|-------------------------------|-------------------------------------------------------------------------------------------------------------------------------------------------------------------------------------------------------------------------------------------------------------------------------------------------------------------------------------------------------------------------------------------------------------------------------------------------------------------------------------------------------------------------------------------------------------------------------------------------------------------------------------------------------------------------------------------------------------------------------------------------------------------------------|
| Journal:                      | <i>BMJ Open</i>                                                                                                                                                                                                                                                                                                                                                                                                                                                                                                                                                                                                                                                                                                                                                               |
| Manuscript ID                 | bmjopen-2021-049604                                                                                                                                                                                                                                                                                                                                                                                                                                                                                                                                                                                                                                                                                                                                                           |
| Article Type:                 | Original research                                                                                                                                                                                                                                                                                                                                                                                                                                                                                                                                                                                                                                                                                                                                                             |
| Date Submitted by the Author: | 28-Jan-2021                                                                                                                                                                                                                                                                                                                                                                                                                                                                                                                                                                                                                                                                                                                                                                   |
| Complete List of Authors:     | Galimov, Artur; University of Southern California Keck School of Medicine, Department of Preventive Medicine<br>Leventhal, Adam; University of Southern California Keck School of Medicine, Department of Preventive Medicine<br>Meza, Leah; University of Southern California Keck School of Medicine, Department of Preventive Medicine<br>Unger, Jennifer; University of Southern California Keck School of Medicine, Department of Preventive Medicine<br>Huh, Jimi; University of Southern California Keck School of Medicine<br>Báezconde-Garbanati, L; University of Southern California Keck School of Medicine, Department of Preventive Medicine<br>Sussman, Steven Y; University of Southern California Keck School of Medicine, Department of Preventive Medicine |
| Keywords:                     | PUBLIC HEALTH, Health policy < HEALTH SERVICES ADMINISTRATION & MANAGEMENT, Substance misuse < PSYCHIATRY                                                                                                                                                                                                                                                                                                                                                                                                                                                                                                                                                                                                                                                                     |
|                               |                                                                                                                                                                                                                                                                                                                                                                                                                                                                                                                                                                                                                                                                                                                                                                               |

SCHOLARONE™  
Manuscripts

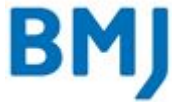

I, the Submitting Author has the right to grant and does grant on behalf of all authors of the Work (as defined in the below author licence), an exclusive licence and/or a non-exclusive licence for contributions from authors who are: i) UK Crown employees; ii) where BMJ has agreed a CC-BY licence shall apply, and/or iii) in accordance with the terms applicable for US Federal Government officers or employees acting as part of their official duties; on a worldwide, perpetual, irrevocable, royalty-free basis to BMJ Publishing Group Ltd ("BMJ") its licensees and where the relevant Journal is co-owned by BMJ to the co-owners of the Journal, to publish the Work in this journal and any other BMJ products and to exploit all rights, as set out in our [licence](#).

The Submitting Author accepts and understands that any supply made under these terms is made by BMJ to the Submitting Author unless you are acting as an employee on behalf of your employer or a postgraduate student of an affiliated institution which is paying any applicable article publishing charge ("APC") for Open Access articles. Where the Submitting Author wishes to make the Work available on an Open Access basis (and intends to pay the relevant APC), the terms of reuse of such Open Access shall be governed by a Creative Commons licence – details of these licences and which [Creative Commons](#) licence will apply to this Work are set out in our licence referred to above.

Other than as permitted in any relevant BMJ Author's Self Archiving Policies, I confirm this Work has not been accepted for publication elsewhere, is not being considered for publication elsewhere and does not duplicate material already published. I confirm all authors consent to publication of this Work and authorise the granting of this licence.

1  
2  
3 **Disposable pod use among vape shop customers: Does the flavor preference matter?**  
4  
5  
6

7 **Artur Galimov<sup>1</sup>; Adam M. Leventhal<sup>1,2</sup>; Leah Meza<sup>1</sup>; Jennifer B. Unger<sup>1</sup>; Jimi Huh<sup>1</sup>;**  
8  
9

10 **Lourdes Baezconde-Garbanati<sup>1</sup>; & Steve Sussman<sup>1,3,4</sup>**  
11  
12  
13  
14  
15  
16  
17  
18

19 **Word count:** 1497  
20  
21  
22  
23  
24  
25  
26

27  
28 <sup>1</sup> Institute for Health Promotion and Disease Prevention, Department  
29 of Preventive Medicine, Keck School of Medicine, University of  
30 Southern California, USA

31 <sup>2</sup> Institute for Addiction Science, University of Southern California,  
32 Los Angeles, USA

33 <sup>3</sup> Department of Psychology, University of Southern California,  
34 USA

35 <sup>4</sup> School of Social Work, University of Southern California, USA  
36  
37  
38  
39  
40  
41  
42  
43

44 **Corresponding author:**

45 Artur Galimov, Institute for Health Promotion and Disease  
46 Prevention Research, Department of Preventive Medicine  
47 Keck School of Medicine of University of Southern California,  
48 2001 N Soto St., 3rd Floor, Los Angeles, CA 90089-9239.

49 E-mail: [galimov@usc.edu](mailto:galimov@usc.edu)  
50  
51  
52  
53  
54  
55  
56  
57  
58  
59  
60

## Abstract

**Objectives:** In February 2020 the US Food and Drug Administration issued guidance restricting the sales and distribution of cartridge-based e-cigarettes with flavors other than tobacco and menthol. Disposable devices were exempted from this guidance. As a response to the rapid proliferation of disposable pods, we examined the prevalence of disposable pod use and flavor preference among vape shop customers, compared to refillable pod and other e-cigarette users.

**Design:** A cross-sectional study.

**Setting:** In July 2019 - March 2020, trained data collectors visited 44 vape shops in California with permission to recruit customers from shop owners.

**Participants:** Intercept interviews with 276 customers were conducted

**Outcomes and procedures:** Disposable pod, refillable pod, and other e-cigarette users were compared on demographics, flavor preference, daily e-cigarette use, preferred nicotine concentration levels and cigarette use.

**Results:** Of the 276 customers surveyed, 12.7% used disposable pods in the past 30-days. Fruit/candy (80.7%), mint (77.4%) and menthol flavors (67.7%) were prevalent among disposable pods users, while tobacco flavors were less prevalent (19.4%). Compared with refillable pod and other e-cigarette users, disposable pod users were younger, used higher nicotine concentration levels, were more likely to prefer mint and menthol flavors, while were less likely to use cigarettes in their lifetime and e-cigarettes daily.

**Discussion:** Disposable pod users were more likely to prefer mint and menthol flavors, while were also younger and preferred to use higher nicotine levels compared to the other e-cigarette users. Further, disposable pod users were more likely to be never smokers, with lower odds for

1  
2  
3 daily vaping. Future regulatory efforts should consider limiting non-tobacco flavors, as well as  
4  
5 the maximum nicotine content in disposable pod devices. Future research evaluating the  
6  
7 prevalence of disposable pod use among youth and their flavor preference is warranted.  
8  
9

### 10 11 12 **Strengths and limitations of this study**

- 14  
15 • This is one of the first studies to examine the consumer preferences for e-cigarette  
16  
17 product characteristics and flavor preference of disposable pod users.
- 18  
19 • Fruit-related, mint and menthol flavors are highly prevalent among disposable pod users,  
20  
21 while tobacco-related flavors are less prevalent. Implications for future regulatory  
22  
23 changes are discussed
- 24  
25 • This study is limited in sample size, and our findings might not be generalizable to vapers  
26  
27 outside the Southern California  
28  
29  
30  
31  
32  
33  
34  
35  
36  
37  
38  
39  
40  
41  
42  
43  
44  
45  
46  
47  
48  
49  
50  
51  
52  
53  
54  
55  
56  
57  
58  
59  
60

## INTRODUCTION

Sales of electronic cigarettes (e-cigarettes) have rapidly increased in recent years, and their prevalence has surpassed combustible tobacco use among youth and young adults<sup>1</sup>. One factor that may contribute to the surge of e-cigarette use is a rapid evolution and diversity of vaping products. Within the last 10 years vaping devices have progressed from thin, cig-a-like disposable and tubular, refillable vape pen devices (i.e., 1<sup>st</sup> and 2<sup>nd</sup> generation) to box mod (3<sup>rd</sup> generation) and to pod mod (JUUL type) devices<sup>2</sup>. In particular, pod mods are small, low-powered, high-nicotine devices that are available in numerous flavors (such as mint, fruit), which have become prevalent among minors and emerging adults<sup>3,4</sup>. To counteract the youth e-cigarette use epidemic, in February 2020 the US Food and Drug Administration (FDA) issued guidance indicating that the manufacture, distribution, and sale of pre-filled cartridge-based (i.e., JUUL, Phix) e-cigarettes without marketing authorization in flavors other than tobacco and menthol would be prioritized for enforcement of unlawful marketing of unauthorized products<sup>5</sup>. Nonetheless, public health professionals have raised concerns because language in the guidance indicated that disposable devices were excluded<sup>6</sup>.

Disposable pod-style devices (i.e., Puff Bar, Posh Plus, Cali Bar) are compact, sleek, ready-to-use, prefilled vaping devices that contain 20-70 mg/ml of nicotine salt and are marketed to deliver 200-300 puffs per device<sup>7</sup>. They are priced as low as \$4.60 USD and are available in mango, mint, strawberry and many other fruit/candy novel flavors with attractive packaging that may be appealing to minors<sup>7</sup>. While there is some evidence suggesting that more e-cigarette users may be replacing the flavored cartridge-based vaping devices with disposable pods<sup>8</sup>, little is known regarding the flavor preferences of disposable pod users.

1  
2  
3 As a response to the rapid proliferation of disposable pods and to inform future flavor and  
4 other regulations of pod-style devices, we assessed the prevalence of disposable pod use and  
5 flavor preference among vape shop customers utilizing intercept interviews, in real time, as  
6 customers completed their visit to the vape shop. Additionally, the differences in consumer  
7 preference for e-cigarette product characteristics between disposable pod users, refillable pod  
8 product users, and other e-cigarette users were examined. We hypothesize that disposable pod  
9 users will use higher nicotine concentration levels and will be more likely to prefer mint and  
10 menthol flavors compared to refillable pod and other e-cigarette device users.  
11  
12  
13  
14  
15  
16  
17  
18  
19  
20  
21



## 22 **METHODS**

### 23 **Participants and procedures**

24  
25 An exhaustive list of eligible vape shops located in Southern California was generated  
26 from Google Maps and Yelp in locations with ethnically diverse populations <sup>9</sup>. From July 2019 -  
27 March 2020 (prior to COVID-19 shutdowns) two or three trained data collectors visited 44 vape  
28 shops (between 10 am and 5 pm during workdays) with permission to recruit customers from  
29 shop owners. All vape shop customers present at the time of data collection were approached by  
30 data collectors as they exited the vape shop (n=425). Eligible participants were those who  
31 reported having vaped in the past 30 days and consented to participate in a 15-minute interview  
32 taking place immediately directly outside the shop. Upon survey completion, participants  
33 received a \$35 gift card. A total of 401 eligible customers were invited to participate in this  
34 study, 276 of them (69%) agreed and were recruited for participation in the customer interviews.  
35  
36  
37  
38  
39  
40  
41  
42  
43  
44  
45  
46  
47  
48  
49  
50 The study was approved by the university's Institutional Review Board  
51  
52  
53  
54  
55  
56  
57  
58  
59  
60



## Measures

Participants were asked to indicate the first nicotine-containing product they used in their life and the most preferred type of e-cigarette device they used in the past 30-days (forced-choice options: pen, box mod, disposable pod style, refillable pod mod or other). Only 3 (1.0%) participants selected “other” and reported (equally) using both refillable pods and box mods; for analyses purposes they were classified as box mod users. Responses were re-coded into a primary exposure variable with three mutually exclusive categories (disposable pod vs. refillable pod vs. other devices [pen and box mod]). Participants’ e-liquid flavor preference was assessed with the question, “Which types of e-juices do you like the most? (Check all that apply)”. The response categories included: “fruit/candy”, “dessert”, “minty flavors”, “menthol”, and “tobacco flavor”. Additionally, we evaluated the preferred e-liquid nicotine level by asking participants: “How many mg per ml of nicotine does your favorite brand/flavor have?”. Past 30-day e-cigarette use was assessed with the item: “In the past 30 day, on how many days did you use e-cigarettes?” (1-30 days). Self-reported measures of gender, age and ethnicity were obtained from each participant.

## Data Analysis

The prevalence of use, demographic characteristics, and flavor preference of disposable pod users are reported. The three groups of users (disposable pod users, refillable pod users, and users of other e-cigarette products) were compared on demographics, flavor preference, daily e-cigarette use, preferred nicotine concentration levels and cigarette use. Statistical significance was set at  $P < .05$  (2-tailed), Benjamini-Hochberg multiple-testing corrections were applied to control the false-discovery rate at .05. All statistical analyses were conducted using Stata software (version 15.1; Stata Corp, College Station, Texas, USA).

## RESULTS

Of the 276 customers surveyed, 76.5% were males, with a mean age of 31.8 years (SD=10.5, range 18-66); 35.9% were non-Hispanic White, 18.1% were Asian, 19.2% were Hispanic/Latino, 9.4% were African American/Black, and 17.4% were of other ethnicities (e.g., Middle Eastern or multiracial). Most participants (77.9%) reported using e-cigarettes every day in the past 30-days. Responses regarding the type of e-cigarette device used in past 30-days in total sample illustrated that 31 (11.2%) used disposable pods, 102 (40.0%) used refillable pods, and 143 (51.8%) used other e-cigarette devices, with the latter category including 129 (46.7%) box mod users and 14 (5.1%) vape pen users. type <sup>a</sup>

Compared with refillable pod users and other e-cigarette users, disposable pod users tended to be younger (mean age: 26.1 vs. 29.7 vs. 34.5 years,  $p<.001$ ), used higher nicotine concentration levels (mean nicotine level: 41.6 vs. 26.4 vs. 5.2 mg/ml,  $p<.001$ ), but were less likely to use e-cigarettes daily (OR=0.22 and OR=0.15,  $p<.001$ ). Fruit/candy (80.7%), mint (77.4%) and menthol (67.7%) were the most preferred flavors among disposable pod users, while tobacco flavor (19.4%) was the least preferred. In fact, disposable pod users compared to refillable pod users and other e-cigarette users were more likely to prefer mint (OR=5.5 and OR=7.7,  $p<.001$ ) and menthol (OR=3.5 and OR=5.1,  $p<.001$ ) flavors. Additionally, disposable pod users were more likely to report e-cigarette as their first nicotine containing product (OR=4.03,  $p=.01$ ) and were less likely to use cigarettes in their lifetime (OR=0.36,  $p=.02$ ) compared to the other e-cigarette device users (see Table 1 for percentages).

## DISCUSSION

In this sample of e-cigarette users who visited the vape shops in Southern California and self-reported using disposable pods, fruit/candy, mint and menthol were the most preferred

1  
2  
3 flavors. In fact, disposable pod users were more likely to prefer mint and menthol flavors  
4  
5 compared to the other e-cigarette users. Our results support findings from past studies that fruit-  
6  
7 related, mint and menthol flavors are highly prevalent among e-cigarette users, while tobacco-  
8  
9 related flavors are less prevalent <sup>3</sup>. Additionally, our results indicate that disposable pod users  
10  
11 preferred to use higher nicotine levels compared to the other e-cigarette users. This may be  
12  
13 because such devices (e.g., Puff Bar) are usually prefilled with 20-70 mg/ml salt nicotine e-  
14  
15 liquid<sup>7</sup>, while other e-cigarette devices can be used with either free-based (0-12 mg/ml) or salt-  
16  
17 based nicotine (>20 mg/ml) e-liquid <sup>2</sup>. Further, our data indicated that disposable pod users were  
18  
19 younger, were less likely to use cigarettes in their lifetime, and more likely to report e-cigarette  
20  
21 as their first nicotine containing product than other e-cigarette users. This might suggest that Puff  
22  
23 Bar-like devices are highly appealing to emerging adults and also to minors <sup>4</sup>. Moreover, it is  
24  
25 unlikely that young vapers are using disposable pods as a means of harm reduction.  
26  
27  
28  
29

30  
31 This study has several limitations. Our findings might not be generalizable to vapers who  
32  
33 obtain their e-cigarette products online, or through other types of brick-and-mortar retail outlets,  
34  
35 and do not visit vape shops, including youth (< 18 years of age) and those outside the Southern  
36  
37 California. Given the nature of the data, recall and social desirability biases may also have  
38  
39 affected the results. The data collection halted because of COVID-19 human subject restrictions  
40  
41 placed on research procedures; thus, it is unclear whether the same results will be observed post-  
42  
43 COVID-19 period. Despite the limitations, our study adds to the existing literature, providing a  
44  
45 valuable source of information about the flavor preferences of disposable pod users.  
46  
47  
48

49  
50 In conclusion, these findings indicate that mint and menthol flavors are prevalent among  
51  
52 disposable pod users, while their nicotine use is relatively high. Future regulatory efforts should  
53  
54 consider limiting non-tobacco flavors, as well as the maximum nicotine content in disposable  
55  
56  
57  
58  
59  
60

1  
2  
3 pod devices, as this may be helpful in curbing the nicotine addiction among younger vapers. A  
4  
5 few of our study participants were 21 years or younger, hence more comprehensive undercover  
6  
7 inspections<sup>10</sup> are needed to insure that tobacco retailers (including vape shops) are not selling  
8  
9 these or other vaping products to minors. Future research evaluating the prevalence of disposable  
10  
11 pod use among youth and their flavor preference is warranted.  
12  
13  
14

## 15 16 **Acknowledgments**

## 17 18 **Declaration of Interests**

19  
20 The Authors declare that there is no conflict of interest. The Authors alone are responsible for  
21  
22 the content and writing of this paper.  
23  
24  
25  
26

## 27 28 **Contributors**

29  
30 All authors took an active role in the manuscript. SS and LB-G designed the research. AG and  
31  
32 LM conducted research under SS supervision. LM coordinated the project. AG, AL and JH  
33  
34 chose the main directions for data analysis and participated in the interpretation of results. AG  
35  
36 performed the statistical analyses and drafted the manuscript. AL, LM, JU, JH, LB-G, and SS  
37  
38 provided critical revision to the manuscript. AG, AL, LM, JU, JH, LB-G, and SS revised the  
39  
40 manuscript before submission. All authors approved the final manuscript submitted.  
41  
42  
43  
44

## 45 46 **Funding**

47  
48 Research reported in this publication was supported by a California Tobacco-Related Disease  
49  
50 Research Program Award (TRDRP Grant #26IR-0016, Steve Sussman, PI) and a National  
51  
52 Cancer Institute and FDA Center for Tobacco Products (CTP) Award (NCI/FDA Grant  
53  
54 #U54CA180905, Mary Ann Pentz and Adam Leventhal, PIs).  
55  
56  
57  
58  
59  
60

**Role of Funder**

TRDRP, NCI, or the FDA had no role in the design and conduct of the study; collection, management, analysis, and interpretation of the data; preparation, review, or approval of the manuscript; and decision to submit the manuscript for publication.

**Patient consent for publication**

Not required.

**Data availability statement**

Data are available on reasonable request. The data that support the findings of this study are available on request from the corresponding author.

Table 1. Participant characteristics for the total sample and by e-cigarette device type <sup>a</sup>

|                                                    | Total<br>n=276 | E-cigarette device type  |                           |                      |                               |                      |
|----------------------------------------------------|----------------|--------------------------|---------------------------|----------------------|-------------------------------|----------------------|
|                                                    |                | Disposable<br>Pod (n=31) | Refillable<br>Pod (n=102) | p-value <sup>b</sup> | Other <sup>c</sup><br>(n=143) | p-value <sup>d</sup> |
| <b>Demographics</b>                                |                |                          |                           |                      |                               |                      |
| Age, mean (SD)                                     | 31.8 (10.5)    | 26.1 (7.9)               | 29.7 (9.5)                | .08                  | 34.5 (10.9)                   | <.001 <sup>e</sup>   |
| Male                                               | 211 (76.5%)    | 26 (83.9%)               | 82 (80.4%)                | .67                  | 103 (72.0%)                   | .18                  |
| <b>Race/Ethnicity</b>                              |                |                          |                           |                      |                               |                      |
| - Asian                                            | 50 (18.1%)     | 6 (19.4%)                | 28 (27.5%)                | .43                  | 16 (11.1%)                    | .34                  |
| - African American/Black                           | 26 (9.4%)      | 2 (6.5%)                 | 7 (6.9%)                  |                      | 17 (11.9%)                    |                      |
| - Hispanic/Latino                                  | 53 (19.2%)     | 5 (16.1%)                | 19 (18.6%)                |                      | 29 (20.3%)                    |                      |
| - White                                            | 99 (35.9%)     | 9 (29.0%)                | 34 (33.3%)                |                      | 56 (39.2%)                    |                      |
| - Other                                            | 48 (17.4%)     | 9 (29.0%)                | 14 (13.7%)                |                      | 25 (17.5%)                    |                      |
| <b>Daily-e-cigarette use (yes vs. no)</b>          | 215 (77.9%)    | 14 (45.2%)               | 80 (78.3%)                | .001 <sup>e</sup>    | 121 (84.6%)                   | <.001 <sup>e</sup>   |
| <b>Lifetime cigarette use (yes vs. no)</b>         | 209 (75.7%)    | 19 (61.3%)               | 83 (81.4%)                | .02 <sup>e</sup>     | 107 (74.8%)                   | .13                  |
| <b>Past 30-day cigarette use (yes vs. no)</b>      | 61 (22.1%)     | 7 (22.6%)                | 28 (27.5%)                | .59                  | 26 (18.2%)                    | .57                  |
| <b>Preferred nicotine level (mg/ml), mean (SD)</b> | 17.0 (18.7)    | 41.6 (17.7)              | 26.4 (18.0)               | <.001 <sup>e</sup>   | 5.2 (6.9)                     | <.001 <sup>e</sup>   |
| <b>First nicotine containing product</b>           |                |                          |                           |                      |                               |                      |
| - E - cigarette                                    | 32 (11.6%)     | 11 (35.5%)               | 9 (8.8%)                  | .01 <sup>ef</sup>    | 12 (8.4%)                     | .11 <sup>f</sup>     |
| - Cigarette or other tobacco product               | 244 (88.4%)    | 20 (64.5%)               | 93 (91.2%)                |                      | 131 (91.6%)                   |                      |
| <b>Flavor preference:</b>                          |                |                          |                           |                      |                               |                      |
| - Fruit/Candy (yes vs. no)                         | 201 (72.8%)    | 25 (80.7%)               | 75 (73.5%)                | .42                  | 101 (70.6%)                   | .26                  |
| - Dessert (yes vs. no)                             | 91 (33.0%)     | 8 (25.8%)                | 26 (25.5%)                | .97                  | 57 (39.9%)                    | .15                  |
| - Mint (yes vs. no)                                | 107 (38.8%)    | 24 (77.4%)               | 39 (38.2%)                | <.001 <sup>e</sup>   | 44 (30.8%)                    | <.001 <sup>e</sup>   |
| - Menthol (yes vs. no)                             | 101 (36.6%)    | 21 (67.7%)               | 38 (37.2%)                | .004 <sup>e</sup>    | 42 (29.4%)                    | <.001 <sup>e</sup>   |
| - Tobacco (yes vs. no)                             | 23 (8.3%)      | 6 (19.4%)                | 6 (5.9%)                  | .03                  | 11 (7.7%)                     | .06                  |

<sup>a</sup> Data are expressed as No. (%) unless otherwise indicated

<sup>b</sup> For the difference between past 30-day disposable pod users and past 30-day refillable pod users

<sup>c</sup> Other devices include box mods and vape pens

<sup>d</sup> For the difference between past 30-day disposable pod users and other device type users

<sup>e</sup> Statistically significant after Benjamini-Hochberg corrections for multiple testing to control false-discovery rate at .05 (based on 2-tailed corrected P value).

<sup>f</sup> Adjusted for age

**REFERENCES**

1. Schulenberg J, Johnston L, O'Malley P, et al. Monitoring the Future national survey results on drug use, 1975-2019: Volume II, college students and adults ages 19-60, 2020.
2. Galstyan E, Galimov A, Sussman S. Commentary: The Emergence of Pod Mods at Vape Shops. *Evaluation & the health professions* 2019;42(1):118-24. doi: 10.1177/0163278718812976 [published Online First: 2018/11/28]
3. Leventhal AM, Miech R, Barrington-Trimis J, et al. Flavors of e-cigarettes used by youths in the United States. *Jama* 2019;322(21):2132-34.
4. US Food and Drug A. PATH Study Findings Give Insight into Flavored Tobacco, Health Effects of E-Cigarettes, and Adult Use of Cigars and Hookah 2020 [Available from: <https://www.fda.gov/tobacco-products/research/path-study-findings-give-insight-flavored-tobacco-health-effects-e-cigarettes-and-adult-use-cigars> accessed November, 05 2020.
5. US Food and Drug A. FDA finalizes enforcement policy on unauthorized flavored cartridge-based e-cigarettes that appeal to children, including fruit and mint 2020 [Available from: <https://www.fda.gov/news-events/press-announcements/fda-finalizes-enforcement-policy-unauthorized-flavored-cartridge-based-e-cigarettes-appeal-children> accessed November, 05 2020.
6. Hemmerich N. Flavoured pod attachments score big as FDA fails to enforce premarket review. *Tobacco Control* 2020
7. Williams R. The rise of disposable JUUL-type e-cigarette devices. *Tobacco Control* 2019
8. Dai H, Hao J. Online popularity of JUUL and Puff Bars in the USA: 2019–2020. *Tobacco Control* 2020

- 1  
2  
3 9. Galimov A, Galstyan E, Yu S, et al. Predictors of vape shops going out of business in  
4  
5 Southern California. *Tobacco Regulatory Science* 2020;6(3):187-95.  
6  
7  
8 10. Sussman S, Galimov A, Delnevo CD. Vape-only versus vape-and-smoke shops: sales to  
9  
10 minors in four states. *Tobacco Control* 2020  
11  
12  
13  
14  
15  
16  
17  
18  
19  
20  
21  
22  
23  
24  
25  
26  
27  
28  
29  
30  
31  
32  
33  
34  
35  
36  
37  
38  
39  
40  
41  
42  
43  
44  
45  
46  
47  
48  
49  
50  
51  
52  
53  
54  
55  
56  
57  
58  
59  
60



STROBE Statement—Checklist of items that should be included in reports of *cross-sectional studies*

|                           | Item No | Recommendation                                                                                                                                                                                               | Page No |
|---------------------------|---------|--------------------------------------------------------------------------------------------------------------------------------------------------------------------------------------------------------------|---------|
| <b>Title and abstract</b> | 1       | (a) Indicate the study's design with a commonly used term in the title or the abstract                                                                                                                       | 2       |
|                           |         | (b) Provide in the abstract an informative and balanced summary of what was done and what was found                                                                                                          | 2       |
| <b>Introduction</b>       |         |                                                                                                                                                                                                              |         |
| Background/rationale      | 2       | Explain the scientific background and rationale for the investigation being reported                                                                                                                         | 4-5     |
| Objectives                | 3       | State specific objectives, including any prespecified hypotheses                                                                                                                                             | 5       |
| <b>Methods</b>            |         |                                                                                                                                                                                                              |         |
| Study design              | 4       | Present key elements of study design early in the paper                                                                                                                                                      | 5       |
| Setting                   | 5       | Describe the setting, locations, and relevant dates, including periods of recruitment, exposure, follow-up, and data collection                                                                              | 5       |
| Participants              | 6       | (a) Give the eligibility criteria, and the sources and methods of selection of participants                                                                                                                  | 5       |
| Variables                 | 7       | Clearly define all outcomes, exposures, predictors, potential confounders, and effect modifiers. Give diagnostic criteria, if applicable                                                                     | 6       |
| Data sources/measurement  | 8*      | For each variable of interest, give sources of data and details of methods of assessment (measurement). Describe comparability of assessment methods if there is more than one group                         | 6       |
| Bias                      | 9       | Describe any efforts to address potential sources of bias                                                                                                                                                    | 6       |
| Study size                | 10      | Explain how the study size was arrived at                                                                                                                                                                    | 5       |
| Quantitative variables    | 11      | Explain how quantitative variables were handled in the analyses. If applicable, describe which groupings were chosen and why                                                                                 | N/A     |
| Statistical methods       | 12      | (a) Describe all statistical methods, including those used to control for confounding                                                                                                                        | 6       |
|                           |         | (b) Describe any methods used to examine subgroups and interactions                                                                                                                                          | 6       |
|                           |         | (c) Explain how missing data were addressed                                                                                                                                                                  | 6       |
|                           |         | (d) If applicable, describe analytical methods taking account of sampling strategy                                                                                                                           | 5       |
|                           |         | (e) Describe any sensitivity analyses                                                                                                                                                                        | N/A     |
| <b>Results</b>            |         |                                                                                                                                                                                                              |         |
| Participants              | 13*     | (a) Report numbers of individuals at each stage of study—eg numbers potentially eligible, examined for eligibility, confirmed eligible, included in the study, completing follow-up, and analysed            | 5       |
|                           |         | (b) Give reasons for non-participation at each stage                                                                                                                                                         | N/A     |
|                           |         | (c) Consider use of a flow diagram                                                                                                                                                                           | N/A     |
| Descriptive data          | 14*     | (a) Give characteristics of study participants (eg demographic, clinical, social) and information on exposures and potential confounders                                                                     | 7       |
|                           |         | (b) Indicate number of participants with missing data for each variable of interest                                                                                                                          | 7       |
| Outcome data              | 15*     | Report numbers of outcome events or summary measures                                                                                                                                                         | 7       |
| Main results              | 16      | (a) Give unadjusted estimates and, if applicable, confounder-adjusted estimates and their precision (eg, 95% confidence interval). Make clear which confounders were adjusted for and why they were included | 7       |

|                          |    |                                                                                                                                                                            |     |
|--------------------------|----|----------------------------------------------------------------------------------------------------------------------------------------------------------------------------|-----|
|                          |    | (b) Report category boundaries when continuous variables were categorized                                                                                                  | 7   |
|                          |    | (c) If relevant, consider translating estimates of relative risk into absolute risk for a meaningful time period                                                           | N/A |
| Other analyses           | 17 | Report other analyses done—eg analyses of subgroups and interactions, and sensitivity analyses                                                                             | N/A |
| <b>Discussion</b>        |    |                                                                                                                                                                            |     |
| Key results              | 18 | Summarise key results with reference to study objectives                                                                                                                   | 7-8 |
| Limitations              | 19 | Discuss limitations of the study, taking into account sources of potential bias or imprecision. Discuss both direction and magnitude of any potential bias                 | 8   |
| Interpretation           | 20 | Give a cautious overall interpretation of results considering objectives, limitations, multiplicity of analyses, results from similar studies, and other relevant evidence | 8-9 |
| Generalisability         | 21 | Discuss the generalisability (external validity) of the study results                                                                                                      | 9   |
| <b>Other information</b> |    |                                                                                                                                                                            |     |
| Funding                  | 22 | Give the source of funding and the role of the funders for the present study and, if applicable, for the original study on which the present article is based              | 9   |

\*Give information separately for exposed and unexposed groups.

**Note:** An Explanation and Elaboration article discusses each checklist item and gives methodological background and published examples of transparent reporting. The STROBE checklist is best used in conjunction with this article (freely available on the Web sites of PLoS Medicine at <http://www.plosmedicine.org/>, Annals of Internal Medicine at <http://www.annals.org/>, and Epidemiology at <http://www.epidem.com/>). Information on the STROBE Initiative is available at [www.strobe-statement.org](http://www.strobe-statement.org).

# BMJ Open

## Prevalence of disposable pod use and consumer preference for e-cigarette product characteristics among vape shop customers in Southern California: a cross-sectional study

|                                 |                                                                                                                                                                                                                                                                                                                                                                                                                                                                                                                                                                                                                                                                                                                                                                                                                                                                                                                                                |
|---------------------------------|------------------------------------------------------------------------------------------------------------------------------------------------------------------------------------------------------------------------------------------------------------------------------------------------------------------------------------------------------------------------------------------------------------------------------------------------------------------------------------------------------------------------------------------------------------------------------------------------------------------------------------------------------------------------------------------------------------------------------------------------------------------------------------------------------------------------------------------------------------------------------------------------------------------------------------------------|
| Journal:                        | <i>BMJ Open</i>                                                                                                                                                                                                                                                                                                                                                                                                                                                                                                                                                                                                                                                                                                                                                                                                                                                                                                                                |
| Manuscript ID                   | bmjopen-2021-049604.R1                                                                                                                                                                                                                                                                                                                                                                                                                                                                                                                                                                                                                                                                                                                                                                                                                                                                                                                         |
| Article Type:                   | Original research                                                                                                                                                                                                                                                                                                                                                                                                                                                                                                                                                                                                                                                                                                                                                                                                                                                                                                                              |
| Date Submitted by the Author:   | 17-Jul-2021                                                                                                                                                                                                                                                                                                                                                                                                                                                                                                                                                                                                                                                                                                                                                                                                                                                                                                                                    |
| Complete List of Authors:       | Galimov, Artur; University of Southern California Keck School of Medicine, Department of Population and Public Health Sciences<br>Leventhal, Adam; University of Southern California Keck School of Medicine, Department of Population and Public Health Sciences<br>Meza, Leah; University of Southern California Keck School of Medicine, Department of Population and Public Health Sciences<br>Unger, Jennifer; University of Southern California Keck School of Medicine, Department of Population and Public Health Sciences<br>Huh, Jimi; University of Southern California Keck School of Medicine, Department of Population and Public Health Sciences<br>Báezconde-Garbanati, L; University of Southern California Keck School of Medicine, Department of Population and Public Health Sciences<br>Sussman, Steven Y; University of Southern California Keck School of Medicine, Department of Population and Public Health Sciences |
| <b>Primary Subject Heading</b>: | Public health                                                                                                                                                                                                                                                                                                                                                                                                                                                                                                                                                                                                                                                                                                                                                                                                                                                                                                                                  |
| Secondary Subject Heading:      | Smoking and tobacco, Addiction                                                                                                                                                                                                                                                                                                                                                                                                                                                                                                                                                                                                                                                                                                                                                                                                                                                                                                                 |
| Keywords:                       | PUBLIC HEALTH, Health policy < HEALTH SERVICES ADMINISTRATION & MANAGEMENT, Substance misuse < PSYCHIATRY                                                                                                                                                                                                                                                                                                                                                                                                                                                                                                                                                                                                                                                                                                                                                                                                                                      |
|                                 |                                                                                                                                                                                                                                                                                                                                                                                                                                                                                                                                                                                                                                                                                                                                                                                                                                                                                                                                                |

SCHOLARONE™  
Manuscripts



I, the Submitting Author has the right to grant and does grant on behalf of all authors of the Work (as defined in the below author licence), an exclusive licence and/or a non-exclusive licence for contributions from authors who are: i) UK Crown employees; ii) where BMJ has agreed a CC-BY licence shall apply, and/or iii) in accordance with the terms applicable for US Federal Government officers or employees acting as part of their official duties; on a worldwide, perpetual, irrevocable, royalty-free basis to BMJ Publishing Group Ltd ("BMJ") its licensees and where the relevant Journal is co-owned by BMJ to the co-owners of the Journal, to publish the Work in this journal and any other BMJ products and to exploit all rights, as set out in our [licence](#).

The Submitting Author accepts and understands that any supply made under these terms is made by BMJ to the Submitting Author unless you are acting as an employee on behalf of your employer or a postgraduate student of an affiliated institution which is paying any applicable article publishing charge ("APC") for Open Access articles. Where the Submitting Author wishes to make the Work available on an Open Access basis (and intends to pay the relevant APC), the terms of reuse of such Open Access shall be governed by a Creative Commons licence – details of these licences and which [Creative Commons](#) licence will apply to this Work are set out in our licence referred to above.

Other than as permitted in any relevant BMJ Author's Self Archiving Policies, I confirm this Work has not been accepted for publication elsewhere, is not being considered for publication elsewhere and does not duplicate material already published. I confirm all authors consent to publication of this Work and authorise the granting of this licence.

1  
2  
3 **Prevalence of disposable pod use and consumer preference for e-cigarette product**  
4  
5 **characteristics among vape shop customers in Southern California: a cross-sectional study**  
6  
7  
8  
9

10 **Artur Galimov<sup>1</sup>; Adam M. Leventhal<sup>1,2</sup>; Leah Meza<sup>1</sup>; Jennifer B. Unger<sup>1</sup>; Jimi Huh<sup>1</sup>;**

11  
12 **Lourdes Baezconde-Garbanati<sup>1</sup>; & Steve Sussman<sup>1,3,4</sup>**  
13  
14  
15  
16  
17  
18  
19  
20  
21  
22

23 **Word count: 2287**  
24  
25  
26  
27  
28  
29

30 <sup>1</sup> Institute for Health Promotion and Disease Prevention, Department  
31 of Population and Public Health Sciences, Keck School of  
32 Medicine, University of Southern California, USA

33 <sup>2</sup> Institute for Addiction Science, University of Southern California,  
34 Los Angeles, USA

35 <sup>3</sup> Department of Psychology, University of Southern California,  
36 USA

37 <sup>4</sup> School of Social Work, University of Southern California, USA  
38  
39  
40  
41  
42  
43

44 **Corresponding author:**

45 Artur Galimov, Institute for Health Promotion and Disease  
46 Prevention Research, Department of Population and Public Health  
47 Sciences

48 Keck School of Medicine of University of Southern California,  
49 2001 N Soto St., 3rd Floor, Los Angeles, CA 90089-9239.

50 E-mail: [galimov@usc.edu](mailto:galimov@usc.edu)  
51  
52  
53  
54  
55  
56  
57  
58  
59  
60

## Abstract

**Objectives:** In February 2020 the US Food and Drug Administration issued a guidance restricting the sales and distribution of cartridge-based e-cigarettes with flavors other than tobacco and menthol. Disposable devices were exempt from this guidance. This study examined the prevalence of disposable pod use and flavor preference compared to refillable pod and other e-cigarette users among vape shop customers.

**Design:** Cross-sectional study.

**Setting:** In July 2019 - March 2020, trained data collectors visited 44 vape shops in California with permission to recruit customers from shop owners.

**Participants:** Intercept interviews with 276 customers were conducted.

**Outcomes and procedures:** Customers were grouped based on self-reported device type used most often (Disposable pod, refillable pod, and other e-cigarettes). Groups were compared on self-reported were compared on demographics, flavors preferred, daily e-cigarette use, preferred nicotine concentration levels and cigarette use.

**Results:** Of the 276 customers surveyed, 12.7% used disposable pods in the past 30-days. Among disposable pod users, fruit/candy (80.7%), mint (77.4%) and menthol (67.7%) were common preferred flavors among disposable pods users, while tobacco flavors were less commonly preferred (19.4%). When compared to refillable pod and other non-pod e-cigarette device users, disposable pod users were younger, used higher nicotine concentration levels, were more likely to prefer mint and menthol flavors and use e-cigarettes as their first product, while less likely to ever use cigarettes and use e-cigarettes daily.

1  
2  
3 **Discussion:** Despite using higher nicotine levels and preferred menthol/mint flavors more often  
4  
5 than users of other devices, disposable pod users reported lower prevalence of lifetime smoking  
6  
7 and daily vaping and were younger. Given the current findings, regulations addressing non-  
8  
9 tobacco flavors and nicotine concentration in disposable pod devices merit consideration in  
10  
11 efforts to reduce vaping in younger adult never smokers.  
12  
13  
14  
15

### 16 **Strengths and limitations of this study**

- 17  
18 • This is one of the first studies to examine the consumer preferences for e-cigarette  
19  
20 product characteristics and flavor preference of disposable pod users.  
21  
22
- 23 • The presented results are suitable to guide future regulatory changes that would limit  
24  
25 non-tobacco flavors, as well as the maximum nicotine concentration in disposable pod  
26  
27 devices.  
28  
29
- 30 • This study is limited in sample size, and our findings might not be generalizable to vapers  
31  
32 outside the Southern California area.  
33  
34  
35  
36  
37  
38  
39  
40  
41  
42  
43  
44  
45  
46  
47  
48  
49  
50  
51  
52  
53  
54  
55  
56  
57  
58  
59  
60

## INTRODUCTION

Sales of electronic cigarettes (e-cigarettes) have rapidly increased in recent years, and their prevalence has surpassed combustible tobacco use among youth and young adults.<sup>1</sup> One factor that may contribute to the surge of e-cigarette use is a rapid evolution and diversity of vaping products. Within the last 10 years vaping devices have progressed from thin, cig-a-like disposable devices (1<sup>st</sup> generation), to tubular, refillable vape pen devices (2<sup>nd</sup> generation), to box mod (3<sup>rd</sup> generation), and to pod mod (JUUL type) devices.<sup>2</sup> In particular, pod mods are small, low-powered, high-nicotine devices that are available in numerous flavors (such as mint, fruit), which have become prevalent among minors and emerging adults.<sup>3 4</sup> To counteract the youth e-cigarette use epidemic, in February 2020 the US Food and Drug Administration (FDA) issued a final guidance indicating that the manufacture, distribution, and sale of pre-filled cartridge-based (i.e., JUUL, Phix) e-cigarettes without marketing authorization in flavors other than tobacco and menthol would be prioritized for enforcement of unlawful marketing of unauthorized products.<sup>5</sup> Nonetheless, public health professionals have raised concerns because language in the guidance failed to include disposable pod devices.<sup>6</sup>

Disposable pod-style devices (i.e., Puff Bar, Ignite, Lush) are compact, sleek, ready-to-use, prefilled vaping devices that contain 20-70 mg/ml of nicotine salt and are marketed to deliver 200-300 puffs per device.<sup>7</sup> They are priced as low as \$4.60 USD and are available in mango, mint, strawberry and many other fruit/candy novel flavors with attractive packaging that may be appealing to minors and young adults.<sup>7</sup> While there is some evidence suggesting that more e-cigarette users may be replacing the flavored cartridge-based vaping devices with disposable pod devices<sup>8</sup>, and their prevalence is increasing among middle and high school youth,<sup>9</sup> little is known regarding the flavor preferences of disposable pod users.



1  
2  
3 To inform future flavor and other regulations of pod-style devices, we assessed the  
4 prevalence of disposable pod use and flavor preference among vape shop customers utilizing  
5 intercept interviews, in real time, as customers exited the vape shop. Additionally, we examined  
6 the differences in consumer preference for e-cigarette product characteristics between disposable  
7 pod users, refillable pod product users, and other e-cigarette users. We hypothesized that  
8 disposable pod users would prefer higher nicotine concentration levels and would be more likely  
9 to prefer mint and menthol flavors compared to refillable pod and other e-cigarette device users.  
10  
11  
12  
13  
14  
15  
16  
17  
18

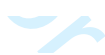

## 19 20 **METHODS**

### 21 **Participants and procedures**

22  
23  
24  
25 A list of eligible vape shops located in Southern California was generated from Google  
26 Maps and Yelp in locations with relatively high proportion of residents representing four ethnic  
27 groups (based on U.S. Census data).<sup>10</sup> From July 2019 - March 2020 (prior to COVID-19  
28 shutdowns) two or three trained data collectors visited a subsample of 44 vape shops between 10  
29 am and 5 pm during workdays with permission to recruit customers from shop owners. All vape  
30 shop customers present at the time of data collection were approached by data collectors as they  
31 exited the vape shop (n=425). Eligible participants were those who reported having vaped in the  
32 past 30-days and agreed to participate in a 15-minute interview. Participants provided verbal  
33 consent prior to taking the survey and were informed that their responses would be kept  
34 anonymous. Upon survey completion, participants received a \$35 gift card. A total of 401  
35 eligible customers were invited to participate in this study, 276 of them (69%) agreed and were  
36 recruited for participation in the customer interviews. The participants that took the survey did  
37 not differ from those who refused to participate in the study by any sociodemographic factor  
38 except for age. That is, subjects that participated in the study were significantly younger than  
39  
40  
41  
42  
43  
44  
45  
46  
47  
48  
49  
50  
51  
52  
53  
54  
55  
56  
57  
58  
59  
60

1  
2  
3 those who refused to take the survey ( $p=0.001$ ). The study was approved by the USC  
4  
5 Institutional Review Board (#HS-18-00732).  
6

## 7 8 **Measures**

9  
10 Self-reported measures of gender, age and ethnicity were obtained from each participant.  
11  
12 Past 30-day e-cigarette use was assessed with the item: *“In the past 30 day, on how many days*  
13 *did you use e-cigarettes?”* (1-30 days). The most frequently used type of e-cigarette device (used  
14  
15 in the past 30-days) was assessed by asking participants: *“What type of e-cigarette device do you*  
16 *use most often?”* (open-ended and further coded into the following categories: pen, box mod,  
17  
18 disposable pod style, refillable pod mod or other). Only 3 (1.0%) participants selected “other”  
19  
20 and reported (equally) using both refillable pods and box mods; for analyses purposes they were  
21  
22 classified as box mod users. Responses were re-coded into a primary exposure variable with  
23  
24 three mutually exclusive categories (disposable pod vs. refillable pod vs. other devices [pen and  
25  
26 box mod]). Additionally, participants were asked to indicate the first nicotine-containing product  
27  
28 they used in their life (i.e., e-cigarette, cigarette, or other tobacco product).  
29  
30  
31  
32  
33  
34

35  
36 Participants’ e-liquid flavor preference was assessed with the question, *“Which types of*  
37 *e-juices do you like the most? (Check all that apply)”*. The response categories included:  
38  
39 *“fruit/candy”, “dessert”, “minty flavors”, “menthol”, and “tobacco flavor”*. Additionally, we  
40  
41 evaluated the preferred e-liquid nicotine level by asking participants: *“How many mg per ml of*  
42 *nicotine does your favorite brand/flavor have?”* (Open-ended, e.g., 0, 3, 6, 9, 12, 18, 24, 25, 50  
43  
44 *mg/ml*).  
45  
46  
47  
48

## 49 **Data Analysis**

50  
51 The prevalence of e-cigarette use, demographic characteristics, and flavor preference of  
52  
53 disposable pod users were reported for the full sample of participants. Further, the three groups  
54  
55  
56  
57  
58  
59  
60

1  
2  
3 of users (disposable pod users, refillable pod users, and users of other e-cigarette products) were  
4 compared regarding demographics, flavor preference, daily e-cigarette use, preferred nicotine  
5 concentration levels and cigarette use. Pearson's chi-square tests were calculated for categorical  
6 study variables, while ANOVA tests were calculated for continuous variables. Statistically  
7 significant variables were then included as dependent variables in multilevel regression analyses  
8 with type of device used (i.e., disposable pods, refillable pod users, and other e-cigarette devices)  
9 as a predictor, while controlling for the nesting of vape shop customers (Level 1) within 44 vape  
10 shops (Level 2). All models were adjusted for sociodemographic factors. Maximum likelihood  
11 estimation was used to account for non-normal distributions and missing data. Odds ratios (ORs)  
12 and Beta coefficients ( $\beta$ s) with 95% CIs were reported with statistical significance set at  $p < .05$   
13 (2-tailed). Benjamini-Hochberg multiple-testing corrections were applied to control the false-  
14 discovery rate at .05. All statistical analyses were conducted using Stata software (version 15.1;  
15 Stata Corp, College Station, Texas, USA).

### 32 **Patient and public involvement**

33  
34  
35 Patients or the public were not involved in the design, conduct, reporting, or  
36 dissemination plans of this study.  
37  
38  
39  
40  
41

## 42 **RESULTS**

43  
44 Of the 276 customers surveyed, 76.5% were males, with a mean age of 31.8 years  
45 (SD=10.5, range 18-66); 35.9% were non-Hispanic White, 18.1% were Asian, 19.2% were  
46 Hispanic/Latino, 9.4% were African American/Black, and 17.4% were of other ethnicities (e.g.,  
47 Middle Eastern or multiracial). Most participants (77.9%) reported using e-cigarettes every day  
48 in the past 30-days. Responses regarding the type of e-cigarette device used in past 30-days in  
49  
50  
51  
52  
53  
54  
55  
56  
57  
58  
59  
60

1  
2  
3 the total sample illustrated that 31 (11.2%) used disposable pods, 102 (40.0%) used refillable  
4 pods, and 143 (51.8%) used other e-cigarette devices, with the latter category including 129  
5  
6 (46.7%) box mod users and 14 (5.1%) vape pen users.  
7  
8  
9

10 Bivariate comparisons between study variables and the type of e-cigarette device used by  
11 vape shops customers in past 30-days are reported in Table 1. Disposable pod users tended to be  
12 younger than other (non-pod) device type users (mean age: 26.1 [SD=7.9] vs. 34.5 [10.9],  
13  
14 p<.001). Disposable pod users also preferred to use higher nicotine concentration levels (mean  
15 nicotine level: 41.6 [17.7] mg/ml) than refillable pod users (26.4 [18.0] mg/ml) and other device  
16 type users (5.2 [6.9] mg/ml, both p<.001). Lifetime cigarette use was more prevalent among  
17 refillable pod users (81.4%) compared to disposable pod users (61.3%, p=0.02). Refillable pod  
18 users (78.3%) and other device type users (84.6%) reported higher prevalence of daily e-cigarette  
19 use compared to disposable pod users (45.2%, both p<.001). Additionally, disposable pod users  
20 reported higher prevalence of using e-cigarettes as their first nicotine containing product (35.5%)  
21 than refillable pod (8.8%) and other device type users (8.4%, both p ≤ .001).  
22  
23  
24  
25  
26  
27  
28  
29  
30  
31  
32  
33  
34

35 Fruit/candy (80.7%), mint (77.4%) and menthol (67.7%) were the most preferred flavors  
36 among disposable pod users, while tobacco flavor (19.4%) was the least preferred. In fact, a  
37 flavor preference of mint and menthol was more prevalent among disposable pod users  
38 compared to refillable pod users and other e-cigarette users (see Table 1). Tobacco flavor  
39 preference was more prevalent among disposable pod users (19.3%), compared to the other  
40 groups (see Table 1). Post-hoc analyses demonstrated that all disposable users who preferred  
41 tobacco flavors reported using combustible tobacco in their lifetime, and their mean age was 30.2  
42 (SD=8.4) years.  
43  
44  
45  
46  
47  
48  
49  
50  
51  
52  
53  
54  
55  
56  
57  
58  
59  
60

1  
2  
3 The multilevel regression models (Table 2) demonstrated that after adjusting for  
4 sociodemographic factors, refillable pod users (OR, 3.79 [95% CI, 1.57 - 9.11]) and other e-  
5 cigarette device type users (OR, 5.80 [95% CI, 2.38 - 14.13]) were more likely to report daily e-  
6 cigarette use compared to disposable pod users. Further, e-liquid nicotine concentration  
7 preference was significantly lower among refillable pod users ( $\beta = -14.90$  [95% CI, 1(-20.34; -  
8 9.46]) and other e-cigarette users ( $\beta = -35.87$  [95% CI, -41.25; -30.48]) than among disposable  
9 pod users. Additionally, refillable pod users were less likely to report e-cigarette as their first  
10 nicotine containing product (OR, 0.27 [95% CI, 0.09 - 0.81]) than disposable pod users. Finally,  
11 it was shown that refillable pod users (OR, 0.17 [95% CI, 0.06 - 0.46]) and other e-cigarette  
12 users (OR, 0.16 [95% CI, 0.06 - 0.43]) were less likely to prefer mint flavors compared to  
13 disposable pod users.  
14  
15  
16  
17  
18  
19  
20  
21  
22  
23  
24  
25  
26  
27



## 28 DISCUSSION

29  
30  
31 In this sample of e-cigarette users who visited the vape shops in Southern California and  
32 self-reported using disposable pod devices, fruit/candy, mint and menthol were the most  
33 common preferred flavors. In fact, mint and menthol flavors were more prevalent among  
34 disposable pod users compared to the other e-cigarette users. Our results support findings from  
35 past studies that fruit-related, mint and menthol flavors are highly prevalent among e-cigarette  
36 users, while tobacco-related flavors are less prevalent<sup>3</sup>, and extend results to vape shop  
37 customers that use disposable pod devices. Tobacco flavor was the least preferred e-liquid flavor  
38 among disposable pod users but was also more prevalent among these users compared to  
39 refillable pod users and other e-cigarette users. However, the comparison of tobacco flavor was  
40 not significant after controlling for multiple test correction and is qualified by the caveat of small  
41 cell size (n=6). As a post-hoc sensitivity analysis, we found that all 6 of these disposable pod  
42  
43  
44  
45  
46  
47  
48  
49  
50  
51  
52  
53  
54  
55  
56  
57  
58  
59  
60

1  
2  
3 users that reported liking tobacco flavors were former combustible tobacco users. This finding  
4  
5 raises the possibility that some vape shop customers might use disposable pod devices with  
6  
7 tobacco flavors as a means to quit smoking combustible tobacco, although the cross-sectional  
8  
9 design and small size precludes definitive conclusion. Future research investigating whether  
10  
11 smokers switch to disposable pod devices that might be less harmful alternative to smoking  
12  
13 combustible cigarettes is warranted.  
14  
15

16  
17 Additionally, our results indicate that disposable pod users reported using products with  
18  
19 higher nicotine levels compared to the other e-cigarette users. This may be because such devices  
20  
21 (e.g., Puff Bar) are usually prefilled with 20-70 mg/ml salt-based nicotine e-liquid,<sup>7</sup> while other  
22  
23 e-cigarette devices can be used with either free-based (0-12 mg/ml) or salt-based nicotine (>20  
24  
25 mg/ml) e-liquid.<sup>2</sup> Further, our data indicated that disposable pod users were younger, were less  
26  
27 likely to use cigarettes in their lifetime, and more likely to report e-cigarette as their first nicotine  
28  
29 containing product than other e-cigarette users. This might suggest that Puff Bar-like devices are  
30  
31 highly appealing to emerging adults, and other research indicates that disposable devices may  
32  
33 also appeal to minors.<sup>4</sup> For instance, one study demonstrated that the relative search volume for  
34  
35 Puff Bar on Google Search has surpassed that of JUUL since February 2020, which may suggest  
36  
37 that e-cigarette users are switching from cartridge-based e-cigarettes to disposable vaping  
38  
39 products.<sup>8</sup> Further, another study demonstrated that the prevalence of disposable pod use has  
40  
41 increased from 3.0% in 2019 to 15.2% in 2020 among middle school students and increased  
42  
43 from 2.4% in 2019 to 26.5% in 2020 among high school students.<sup>9</sup>  
44  
45  
46  
47  
48

49 This study has several limitations. Our findings might not be generalizable to vapers who  
50  
51 obtain their e-cigarette products online, or through other types of brick-and-mortar retail outlets,  
52  
53 and do not visit vape shops, including youth (< 18 years of age) and those outside the Southern  
54  
55  
56  
57  
58  
59

1  
2  
3 California. Subjects participated in the study were significantly younger than those who refused to  
4 take the survey, thus our study findings may have limited generalizability to older vapers. Given  
5 the nature of the data, recall and social desirability biases may also have affected the results. The  
6 data collection halted because of COVID-19 human subject restrictions placed on research  
7 procedures; thus, it is unclear whether the same results will be observed in the post-COVID-19  
8 period. The actual number of participants who used disposable pods was relatively small (n=31  
9 [11.2%]), while the data were collected during a time of changing federal regulation of e-  
10 cigarette products<sup>5</sup> (which led to the surge in disposable use prevalence); thus it is also not clear  
11 whether the same results will be observed 1 year after the data were collected. Despite the  
12 limitations, our study adds to the existing literature, providing a valuable source of information  
13 about the flavor preferences of disposable pod users.  
14  
15  
16  
17  
18  
19  
20  
21  
22  
23  
24  
25  
26  
27

28 In conclusion, these findings indicate that disposable pod users reported using products  
29 with higher nicotine levels and preferred mint and menthol flavors more often than users of other  
30 devices; nonetheless, disposable pod users reported lower prevalence of lifetime smoking and  
31 daily vaping, while they were also younger. Given the current findings and previous studies showing  
32 sizeable proportions of youth use disposable pod e-cigarettes, future regulatory efforts addressing  
33 non-tobacco flavors and nicotine concentration in disposable pod devices merit consideration in  
34 efforts to reduce vaping in young populations and never smokers. Future research evaluating  
35 whether disposable pod use causes a greater risk for e-cigarette use experimentation and  
36 development of nicotine dependence is warranted.  
37  
38  
39  
40  
41  
42  
43  
44  
45  
46  
47  
48  
49  
50  
51  
52  
53  
54  
55  
56  
57  
58  
59  
60

## Acknowledgments

### Declaration of Interests

The Authors declare that there is no conflict of interest. The Authors alone are responsible for the content and writing of this paper.

### Contributors

All authors took an active role in the manuscript. SS and LB-G designed the research. AG and LM conducted research under SS supervision. LM coordinated the project. AG, AL and JH chose the main directions for data analysis and participated in the interpretation of results. AG performed the statistical analyses and drafted the manuscript. AL, LM, JU, JH, LB-G, and SS provided critical revision to the manuscript. AG, AL, LM, JU, JH, LB-G, and SS revised the manuscript before submission. All authors approved the final manuscript submitted.

### Funding

Research reported in this publication was supported by a California Tobacco-Related Disease Research Program Award (TRDRP Grant #26IR-0016, Steve Sussman, PI) and a National Cancer Institute and FDA Center for Tobacco Products (CTP) Award (NCI/FDA Grant #U54CA180905, Mary Ann Pentz and Adam Leventhal, PIs).

### Role of Funder

TRDRP, NCI, or the FDA had no role in the design and conduct of the study; collection, management, analysis, and interpretation of the data; preparation, review, or approval of the manuscript; and decision to submit the manuscript for publication.



1  
2  
3 **Patient consent for publication**  
4

5 Not required.  
6  
7  
8  
9

10 **Data availability statement**  
11

12 The data that support the findings of this study are available on request from the corresponding  
13 author.  
14  
15  
16  
17  
18  
19  
20  
21  
22  
23  
24  
25  
26  
27  
28  
29  
30  
31  
32  
33  
34  
35  
36  
37  
38  
39  
40  
41  
42  
43  
44  
45  
46  
47  
48  
49  
50  
51  
52  
53  
54  
55  
56  
57  
58  
59  
60

For peer review only

Table 1. Participant characteristics for the total sample and by e-cigarette device type <sup>a</sup>

|                                                    | Total<br>n=276 | E-cigarette device type  |                           |                      |                               |                      |
|----------------------------------------------------|----------------|--------------------------|---------------------------|----------------------|-------------------------------|----------------------|
|                                                    |                | Disposable<br>Pod (n=31) | Refillable<br>Pod (n=102) | p-value <sup>b</sup> | Other <sup>c</sup><br>(n=143) | p-value <sup>d</sup> |
| <b>Demographics</b>                                |                |                          |                           |                      |                               |                      |
| Age, mean (SD)                                     | 31.8 (10.5)    | 26.1 (7.9)               | 29.7 (9.5)                | .08                  | 34.5 (10.9)                   | <.001 <sup>e</sup>   |
| Male                                               | 211 (76.5%)    | 26 (83.9%)               | 82 (80.4%)                | .67                  | 103 (72.0%)                   | .18                  |
| <b>Race/Ethnicity</b>                              |                |                          |                           |                      |                               |                      |
| - Asian                                            | 50 (18.1%)     | 6 (19.4%)                | 28 (27.5%)                | .43                  | 16 (11.1%)                    | .34                  |
| - African American/Black                           | 26 (9.4%)      | 2 (6.5%)                 | 7 (6.9%)                  |                      | 17 (11.9%)                    |                      |
| - Hispanic/Latino                                  | 53 (19.2%)     | 5 (16.1%)                | 19 (18.6%)                |                      | 29 (20.3%)                    |                      |
| - White                                            | 99 (35.9%)     | 9 (29.0%)                | 34 (33.3%)                |                      | 56 (39.2%)                    |                      |
| - Other                                            | 48 (17.4%)     | 9 (29.0%)                | 14 (13.7%)                |                      | 25 (17.5%)                    |                      |
| <b>Daily-e-cigarette use</b>                       | 215 (77.9%)    | 14 (45.2%)               | 80 (78.3%)                | .001 <sup>e</sup>    | 121 (84.6%)                   | <.001 <sup>e</sup>   |
| <b>Lifetime cigarette use</b>                      | 209 (75.7%)    | 19 (61.3%)               | 83 (81.4%)                | .02 <sup>e</sup>     | 107 (74.8%)                   | .13                  |
| <b>Past 30-day cigarette use</b>                   | 61 (22.1%)     | 7 (22.6%)                | 28 (27.5%)                | .59                  | 26 (18.2%)                    | .57                  |
| <b>Preferred nicotine level (mg/ml), mean (SD)</b> | 17.0 (18.7)    | 41.6 (17.7)              | 26.4 (18.0)               | <.001 <sup>e</sup>   | 5.2 (6.9)                     | <.001 <sup>e</sup>   |
| <b>First nicotine containing product</b>           |                |                          |                           |                      |                               |                      |
| - E - cigarette                                    | 32 (11.6%)     | 11 (35.5%)               | 9 (8.8%)                  | .001 <sup>e</sup>    | 12 (8.4%)                     | <.001 <sup>e</sup>   |
| - Cigarette or other tobacco product               | 244 (88.4%)    | 20 (64.5%)               | 93 (91.2%)                |                      | 131 (91.6%)                   |                      |
| <b>Flavor preference:</b>                          |                |                          |                           |                      |                               |                      |
| - Fruit/Candy                                      | 201 (72.8%)    | 25 (80.7%)               | 75 (73.5%)                | .42                  | 101 (70.6%)                   | .26                  |
| - Dessert                                          | 91 (33.0%)     | 8 (25.8%)                | 26 (25.5%)                | .97                  | 57 (39.9%)                    | .15                  |
| - Mint                                             | 107 (38.8%)    | 24 (77.4%)               | 39 (38.2%)                | <.001 <sup>e</sup>   | 44 (30.8%)                    | <.001 <sup>e</sup>   |
| - Menthol                                          | 101 (36.6%)    | 21 (67.7%)               | 38 (37.2%)                | .004 <sup>e</sup>    | 42 (29.4%)                    | <.001 <sup>e</sup>   |
| - Tobacco                                          | 23 (8.3%)      | 6 (19.4%)                | 6 (5.9%)                  | .03                  | 11 (7.7%)                     | .06                  |

<sup>a</sup> Data are expressed as No. (%) unless otherwise indicated

<sup>b</sup> For the difference between past 30-day disposable pod users and past 30-day refillable pod users

<sup>c</sup> Other devices include box mods and vape pens

<sup>d</sup> For the difference between past 30-day disposable pod users and other device type users

<sup>e</sup> Statistically significant after Benjamini-Hochberg corrections for multiple testing to control false-discovery rate at .05 (based on 2-tailed corrected P value).

Table 2. Multilevel regression models examining the associations between type of e-cigarette device used and study variables.

| Dependent variables               | E-cigarette device type |                        |         |                                    |         |
|-----------------------------------|-------------------------|------------------------|---------|------------------------------------|---------|
|                                   | Disposable Pod Use      | Refillable Pod Use     |         | Other Device Type Use <sup>a</sup> |         |
|                                   | OR (95% CI)             | OR (95% CI)            | p-value | OR (95% CI)                        | p-value |
| Daily-e-cigarette use             | ref                     | 3.79 (1.57 - 9.11)     | .003*   | 5.80 (2.38 - 14.13)                | <.001*  |
| Lifetime cigarette use            | ref                     | 1.86 (0.63 - 5.56)     | .26     | 0.76 (0.26 - 2.25)                 | .61     |
| Preferred nicotine level (mg/ml)  | ref                     |                        |         |                                    |         |
| First nicotine containing product |                         |                        |         |                                    |         |
| - E - cigarette                   | ref                     | 0.27 (0.09 - 0.81)     | .02*    | 0.37 (0.12 - 1.12)                 | .08     |
| Flavor preference:                |                         |                        |         |                                    |         |
| - Mint                            | ref                     | 0.17 (0.06 - 0.46)     | <.001*  | 0.16 (0.06 - 0.43)                 | <.001*  |
| - Menthol                         | ref                     | 0.34 (0.11 - 0.99)     | .05     | 0.36 (0.12 - 1.04)                 | .06     |
| Dependent variables               | $\beta$ (95% CI)        | $\beta$ (95% CI)       | p-value | $\beta$ (95% CI)                   | p-value |
| Preferred nicotine level (mg/ml)  | ref                     | -14.90 (-20.34; -9.46) | <.001*  | -35.87 (-41.25; -30.48)            | <.001*  |

All models were adjusted for age, gender, and ethnicity. Abbreviations: OR=Odds Ratio; CI=Confidence Interval; ref=reference

\* Statistically significant after Benjamini-Hochberg corrections for multiple testing to control false-discovery rate at .05 (based on 2-tailed corrected P value)

<sup>a</sup> Other devices include box mods and vape pens

**REFERENCES**

1. Schulenberg J, Johnston L, O'Malley P, et al. Monitoring the Future national survey results on drug use, 1975-2019: Volume II, college students and adults ages 19-60, 2020.
2. Galstyan E, Galimov A, Sussman S. Commentary: The Emergence of Pod Mods at Vape Shops. *Evaluation & the health professions* 2019;42(1):118-24. doi: 10.1177/0163278718812976 [published Online First: 2018/11/28]
3. Leventhal AM, Miech R, Barrington-Trimis J, et al. Flavors of e-cigarettes used by youths in the United States. *Jama* 2019;322(21):2132-34.
4. US Food and Drug Administration. PATH Study Findings Give Insight into Flavored Tobacco, Health Effects of E-Cigarettes, and Adult Use of Cigars and Hookah. 2020; <https://www.fda.gov/tobacco-products/research/path-study-findings-give-insight-flavored-tobacco-health-effects-e-cigarettes-and-adult-use-cigars> Accessed July, 12 2021.
5. US Food and Drug Administration. FDA finalizes enforcement policy on unauthorized flavored cartridge-based e-cigarettes that appeal to children, including fruit and mint. 2020; <https://www.fda.gov/news-events/press-announcements/fda-finalizes-enforcement-policy-unauthorized-flavored-cartridge-based-e-cigarettes-appeal-children> Accessed July, 12 2021.
6. Hemmerich N. Flavoured pod attachments score big as FDA fails to enforce premarket review. *Tobacco Control* 2020
7. Williams R. The rise of disposable JUUL-type e-cigarette devices. *Tobacco Control* 2019
8. Dai H, Hao J. Online popularity of JUUL and Puff Bars in the USA: 2019–2020. *Tobacco Control* 2020

- 1  
2  
3 9. Wang TW, Gentzke AS, Neff LJ, et al. Disposable E-Cigarette Use among US Youth—An  
4  
5 Emerging Public Health Challenge. *New England Journal of Medicine*  
6  
7 2021;384(16):1573-76.  
8  
9  
10 10. Galimov A, Galstyan E, Yu S, et al. Predictors of vape shops going out of business in  
11  
12 Southern California. *Tobacco Regulatory Science* 2020;6(3):187-95.  
13  
14  
15  
16  
17  
18  
19  
20  
21  
22  
23  
24  
25  
26  
27  
28  
29  
30  
31  
32  
33  
34  
35  
36  
37  
38  
39  
40  
41  
42  
43  
44  
45  
46  
47  
48  
49  
50  
51  
52  
53  
54  
55  
56  
57  
58  
59  
60

STROBE Statement—Checklist of items that should be included in reports of *cross-sectional studies*

|                              | Item No                                                                            | Recommendation                                                                                                                                                                                               | Page No |
|------------------------------|------------------------------------------------------------------------------------|--------------------------------------------------------------------------------------------------------------------------------------------------------------------------------------------------------------|---------|
| <b>Title and abstract</b>    | 1                                                                                  | (a) Indicate the study's design with a commonly used term in the title or the abstract                                                                                                                       | 2       |
|                              |                                                                                    | (b) Provide in the abstract an informative and balanced summary of what was done and what was found                                                                                                          | 2       |
| <b>Introduction</b>          |                                                                                    |                                                                                                                                                                                                              |         |
| Background/rationale         | 2                                                                                  | Explain the scientific background and rationale for the investigation being reported                                                                                                                         | 4-5     |
| Objectives                   | 3                                                                                  | State specific objectives, including any prespecified hypotheses                                                                                                                                             | 5       |
| <b>Methods</b>               |                                                                                    |                                                                                                                                                                                                              |         |
| Study design                 | 4                                                                                  | Present key elements of study design early in the paper                                                                                                                                                      | 5       |
| Setting                      | 5                                                                                  | Describe the setting, locations, and relevant dates, including periods of recruitment, exposure, follow-up, and data collection                                                                              | 5       |
| Participants                 | 6                                                                                  | (a) Give the eligibility criteria, and the sources and methods of selection of participants                                                                                                                  | 5       |
| Variables                    | 7                                                                                  | Clearly define all outcomes, exposures, predictors, potential confounders, and effect modifiers. Give diagnostic criteria, if applicable                                                                     | 6       |
| Data sources/<br>measurement | 8*                                                                                 | For each variable of interest, give sources of data and details of methods of assessment (measurement). Describe comparability of assessment methods if there is more than one group                         | 6       |
| Bias                         | 9                                                                                  | Describe any efforts to address potential sources of bias                                                                                                                                                    | 7       |
| Study size                   | 10                                                                                 | Explain how the study size was arrived at                                                                                                                                                                    | 5       |
| Quantitative variables       | 11                                                                                 | Explain how quantitative variables were handled in the analyses. If applicable, describe which groupings were chosen and why                                                                                 | 6       |
| Statistical methods          | 12                                                                                 | (a) Describe all statistical methods, including those used to control for confounding                                                                                                                        | 6-7     |
|                              |                                                                                    | (b) Describe any methods used to examine subgroups and interactions                                                                                                                                          | 7       |
|                              | (c) Explain how missing data were addressed                                        | 7                                                                                                                                                                                                            |         |
|                              | (d) If applicable, describe analytical methods taking account of sampling strategy | 5                                                                                                                                                                                                            |         |
|                              | (e) Describe any sensitivity analyses                                              | N/A                                                                                                                                                                                                          |         |
| <b>Results</b>               |                                                                                    |                                                                                                                                                                                                              |         |
| Participants                 | 13*                                                                                | (a) Report numbers of individuals at each stage of study—eg numbers potentially eligible, examined for eligibility, confirmed eligible, included in the study, completing follow-up, and analysed            | 5       |
|                              |                                                                                    | (b) Give reasons for non-participation at each stage                                                                                                                                                         | 5       |
|                              |                                                                                    | (c) Consider use of a flow diagram                                                                                                                                                                           | N/A     |
| Descriptive data             | 14*                                                                                | (a) Give characteristics of study participants (eg demographic, clinical, social) and information on exposures and potential confounders                                                                     | 7       |
|                              |                                                                                    | (b) Indicate number of participants with missing data for each variable of interest                                                                                                                          | 7-8     |
| Outcome data                 | 15*                                                                                | Report numbers of outcome events or summary measures                                                                                                                                                         | 7-8     |
| Main results                 | 16                                                                                 | (a) Give unadjusted estimates and, if applicable, confounder-adjusted estimates and their precision (eg, 95% confidence interval). Make clear which confounders were adjusted for and why they were included | 8-9     |

|                          |    |                                                                                                                                                                            |       |
|--------------------------|----|----------------------------------------------------------------------------------------------------------------------------------------------------------------------------|-------|
|                          |    | (b) Report category boundaries when continuous variables were categorized                                                                                                  | 7-8   |
|                          |    | (c) If relevant, consider translating estimates of relative risk into absolute risk for a meaningful time period                                                           | N/A   |
| Other analyses           | 17 | Report other analyses done—eg analyses of subgroups and interactions, and sensitivity analyses                                                                             | 8     |
| <b>Discussion</b>        |    |                                                                                                                                                                            |       |
| Key results              | 18 | Summarise key results with reference to study objectives                                                                                                                   | 9-10  |
| Limitations              | 19 | Discuss limitations of the study, taking into account sources of potential bias or imprecision. Discuss both direction and magnitude of any potential bias                 | 10-11 |
| Interpretation           | 20 | Give a cautious overall interpretation of results considering objectives, limitations, multiplicity of analyses, results from similar studies, and other relevant evidence | 9-11  |
| Generalisability         | 21 | Discuss the generalisability (external validity) of the study results                                                                                                      | 10-11 |
| <b>Other information</b> |    |                                                                                                                                                                            |       |
| Funding                  | 22 | Give the source of funding and the role of the funders for the present study and, if applicable, for the original study on which the present article is based              | 12    |

\*Give information separately for exposed and unexposed groups.

**Note:** An Explanation and Elaboration article discusses each checklist item and gives methodological background and published examples of transparent reporting. The STROBE checklist is best used in conjunction with this article (freely available on the Web sites of PLoS Medicine at <http://www.plosmedicine.org/>, Annals of Internal Medicine at <http://www.annals.org/>, and Epidemiology at <http://www.epidem.com/>). Information on the STROBE Initiative is available at [www.strobe-statement.org](http://www.strobe-statement.org).
